# Supplementary material for: CuI nanoparticle-immobilized on a hybrid material composed of IRMOF-3 and a sulfonamide-based porous organic polymer as an efficient nanocatalyst for one-pot synthesis of 2,4-diaryl-quinolines
Source: Royal Society of Chemistry journal article supplement (doi:10.1039/d3ra01164j), 2023-01-01

**CuI nanoparticles-immobilized on a hybrid material composed of IRMOF-3 and a sulfonamide-based porous organic polymer as an efficient nanocatalyst for one-pot synthesis of 2,4-diaryl-quinolines**

Samaneh Koosha, Sedigheh Alavinia, Ramin Ghorbani-Vaghei,\*

Department of Organic Chemistry, Faculty of Chemistry, Bu-Ali Sina University, 6517838683, Hamadan, Iran

Corresponding Author: Fax: Tel./Fax: +98-8138380709

E-mail: [rgvaghei@yahoo.com](mailto:rgvaghei@yahoo.com) & [ghorbani@basu.ac.ir](mailto:ghorbani@basu.ac.ir)

$^1\text{H}$  NMR (500 MHz,  $\text{DMSO-}d_6$ , TMS)  $\delta$  8.55 (d,  $J = 6.8$  Hz, 1H), 8.52 (d,  $J = 3.4$  Hz, 2H), 8.09 (d,  $J = 8.6$  Hz, 1H), 7.97 (t,  $J = 9.0$  Hz, 3H), 7.91 (d,  $J = 7.8$  Hz, 1H), 7.60 (d,  $J = 9.1$  Hz, 1H), 7.55-7.46 (m, 3H), 7.29 – 7.24 (m, 1H), 6.89 (s, 1H), 3.71 (s, 3H).  $^{13}\text{C}$  NMR (126 MHz,  $\text{DMSO-}d_6$ , TMS)  $\delta$  163.02, 155.62, 146.68, 145.61, 139.27, 134.78, 134.27, 132.67, 132.18, 127.95, 126.11, 125.05, 115.79, 61.46.

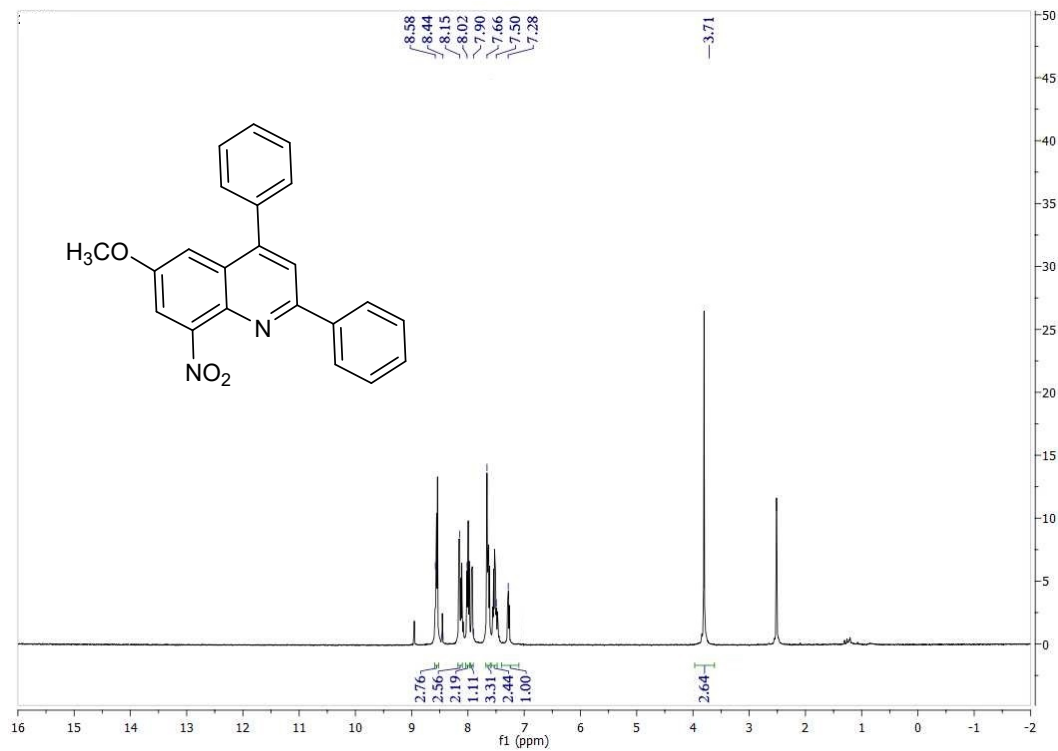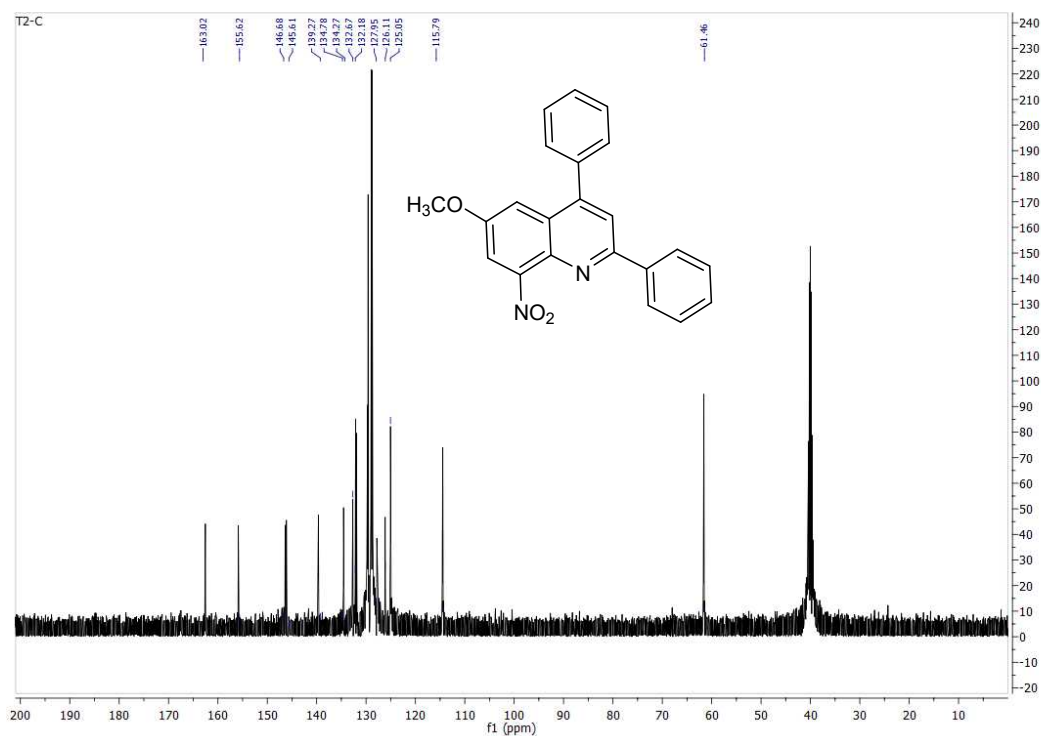

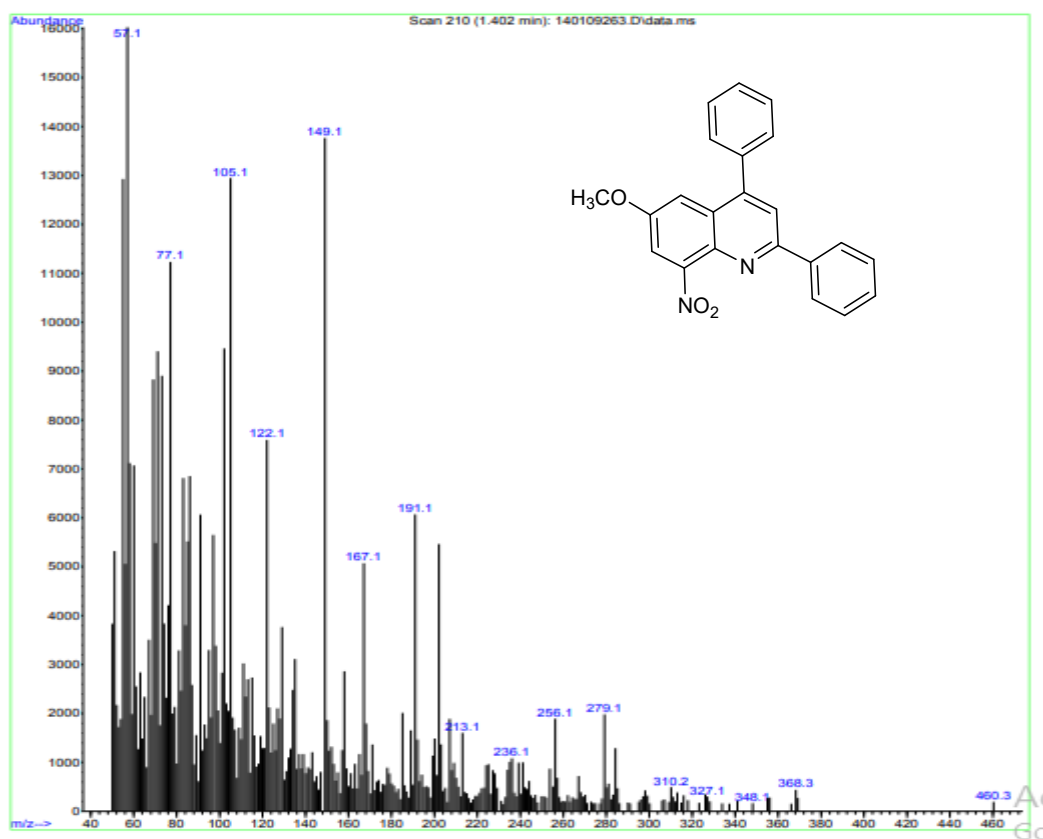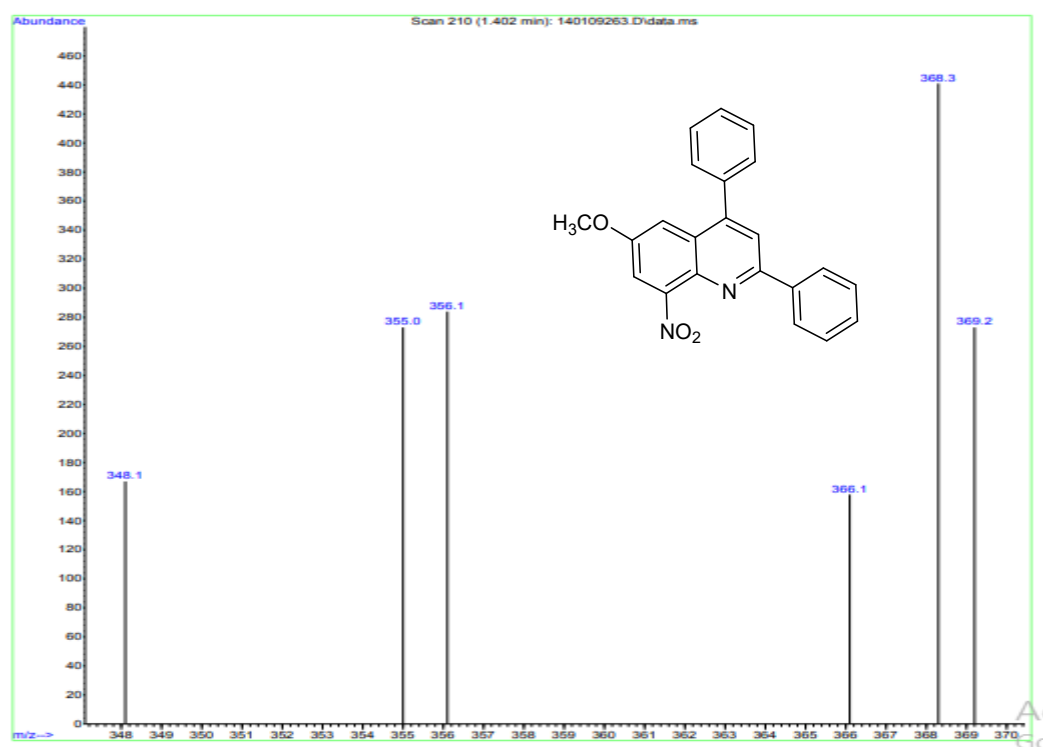

$^1\text{H}$  NMR (500 MHz,  $\text{DMSO}-d_6$ , TMS)  $\delta$  8.58 – 8.51 (m, 5H), 8.15 (d,  $J = 7.9$  Hz, 3H), 8.12 (d,  $J = 8.5$  Hz, 2H), 8.00 (t,  $J = 9.7$  Hz, 4H), 7.93 (d,  $J = 7.7$  Hz, 2H), 7.68 – 7.62 (m, 5H), 7.62 (s, 1H), 7.56 – 7.49 (m, 4H), 7.35 – 7.19 (m, 2H), 6.91 (s, 2H).  $^{13}\text{C}$  NMR (126 MHz,  $\text{DMSO}-d_6$ , TMS)  $\delta$  159.91,

149.43, 133.72, 133.07, 131.93, 128.59, 128.49, 128.05, 127.40, 126.81, 126.34, 125.51, 124.48, 124.28, 117.10, 112.74, 110.15. MS m/z (%): 315.08.

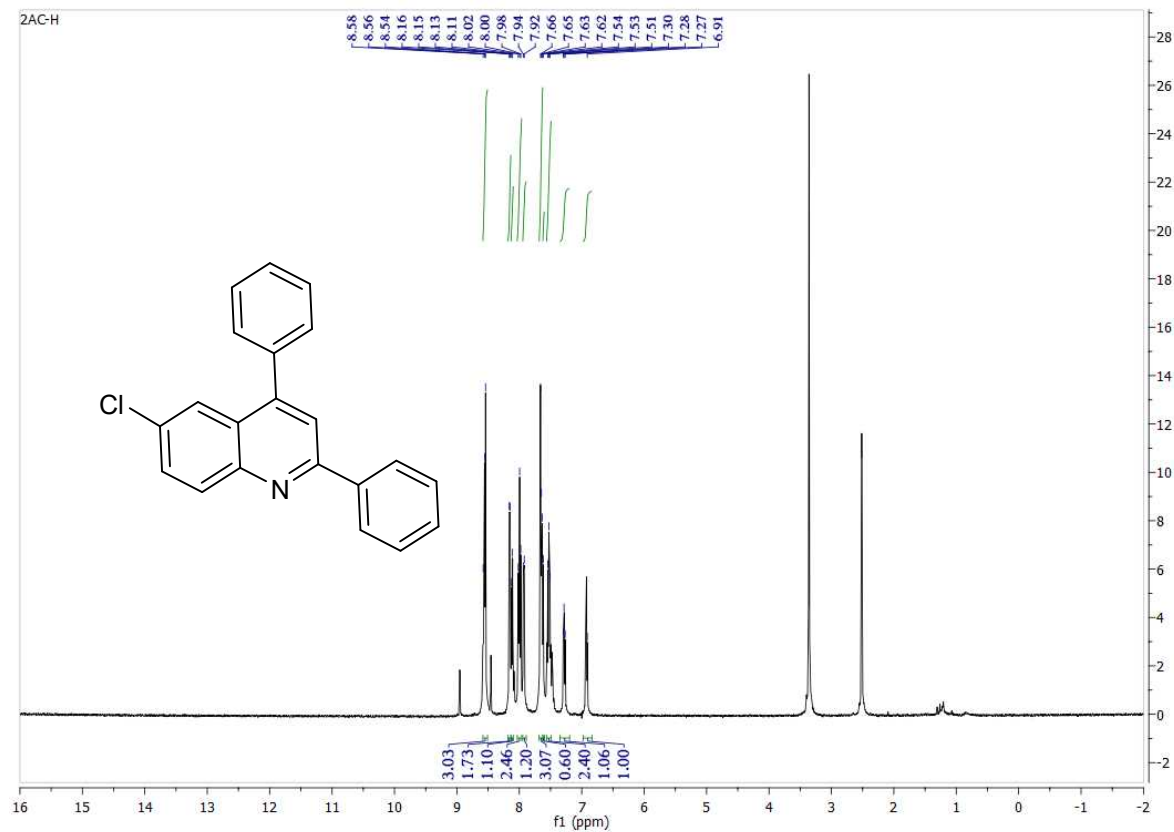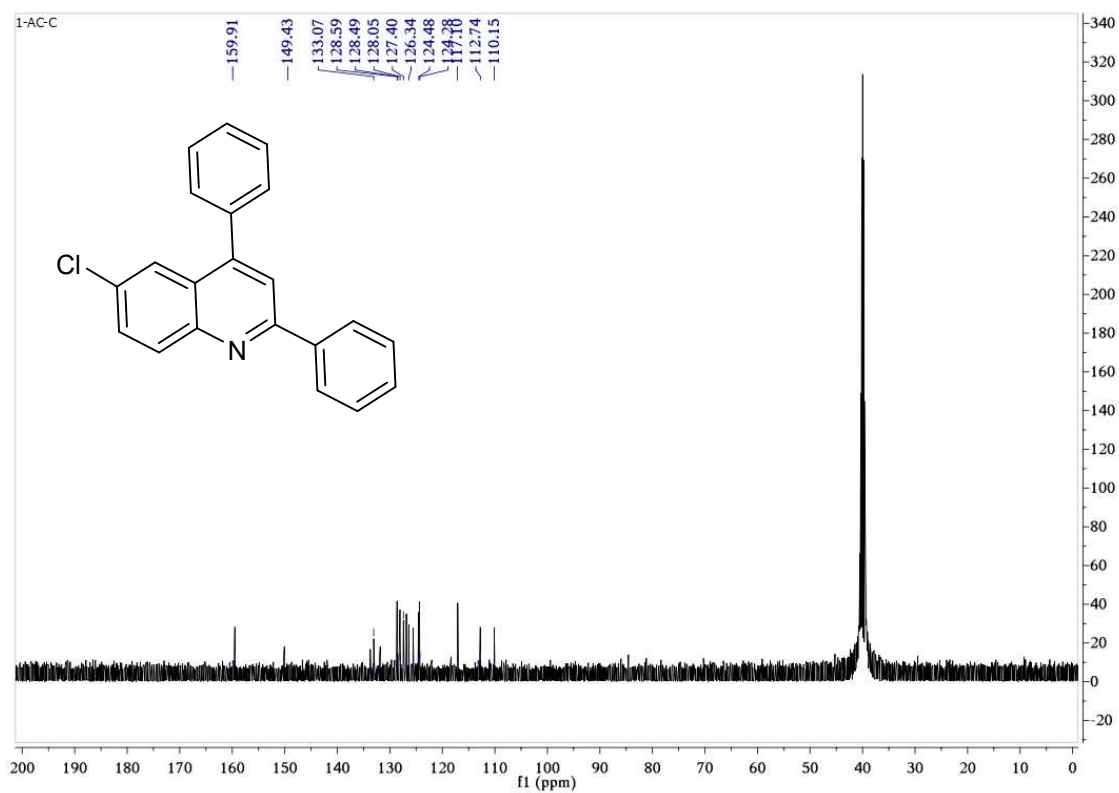

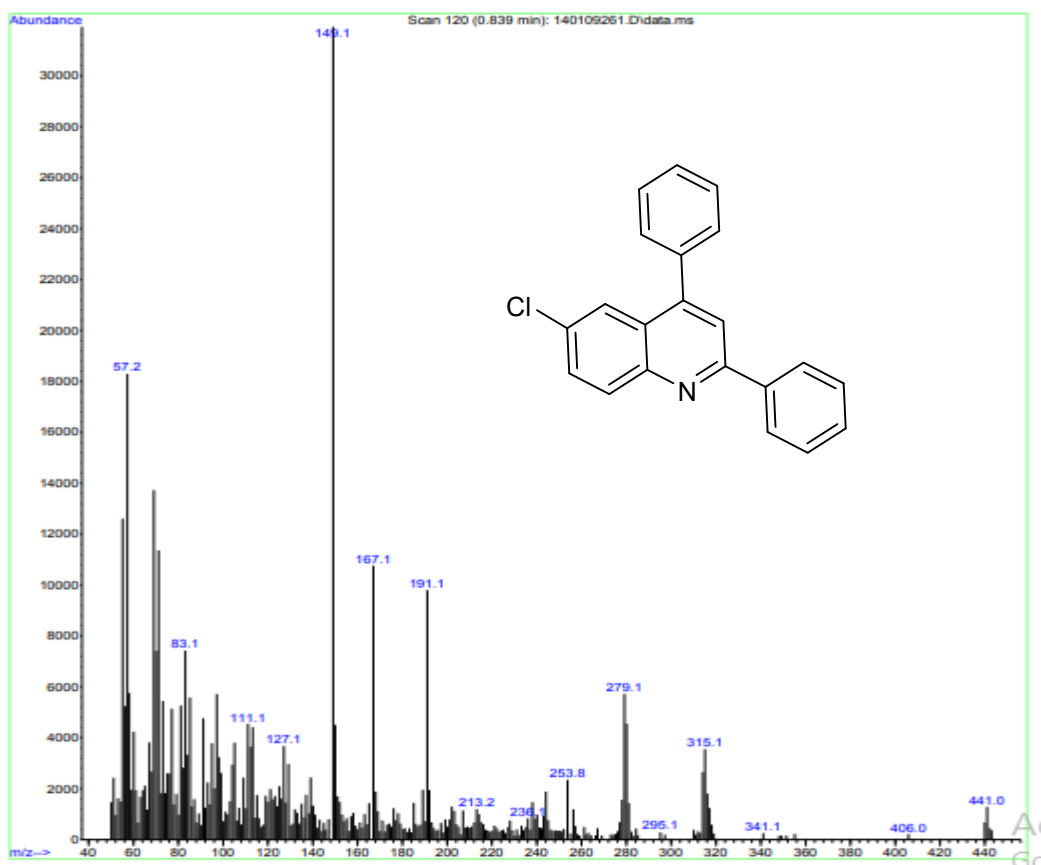

$^1\text{H}$  NMR (500 MHz,  $\text{DMSO-}d_6$ , TMS)  $\delta$  8.84 (m, 3H), 8.16 (s, 1H), 8.09 (d,  $J = 7.6$  Hz, 1H), 8.06 (s, 2H), 7.86 (s, 2H), 7.72 (d,  $J = 8.0$  Hz, 1H), 7.66 (d,  $J = 2.5$  Hz, 1H), 7.64 (d,  $J = 8.2$  Hz, 1H), 7.53 (s, 1H).  $^{13}\text{C}$  NMR (126 MHz,  $\text{DMSO-}d_6$ , TMS)  $\delta$  166.50, 164.13, 163.30, 151.38, 134.62, 133.79, 133.36, 133.13, 132.63, 131.91, 131.06, 130.74, 129.27, 128.34, 126.93, 126.02, 125.42, 120.81, MS  $m/z$  (%): 361.1.

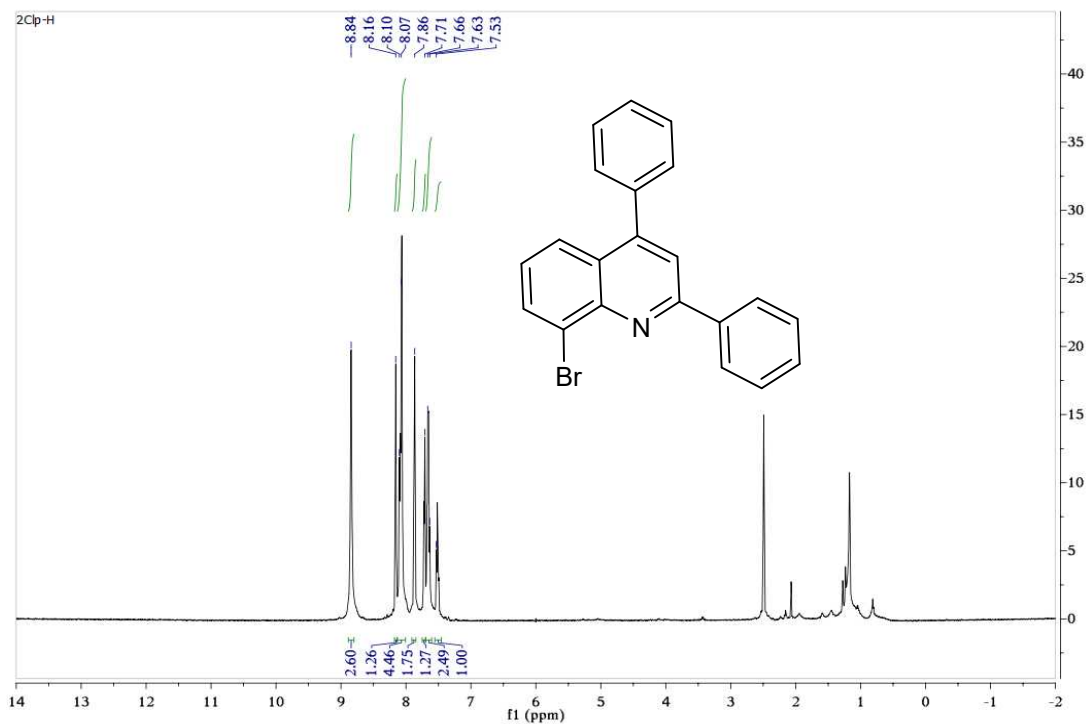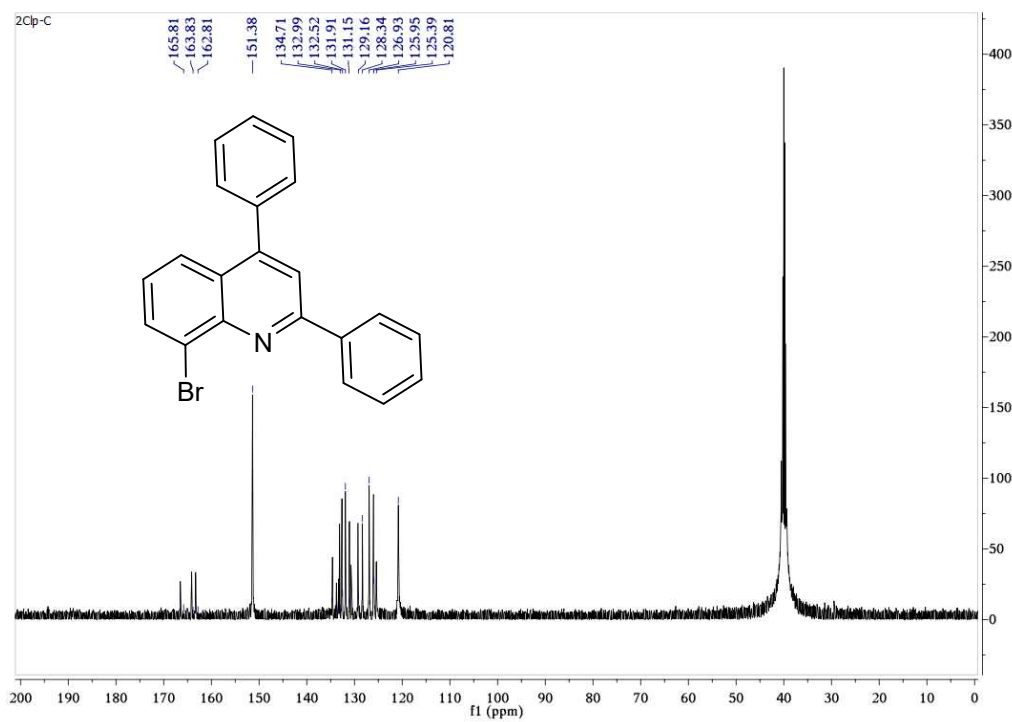

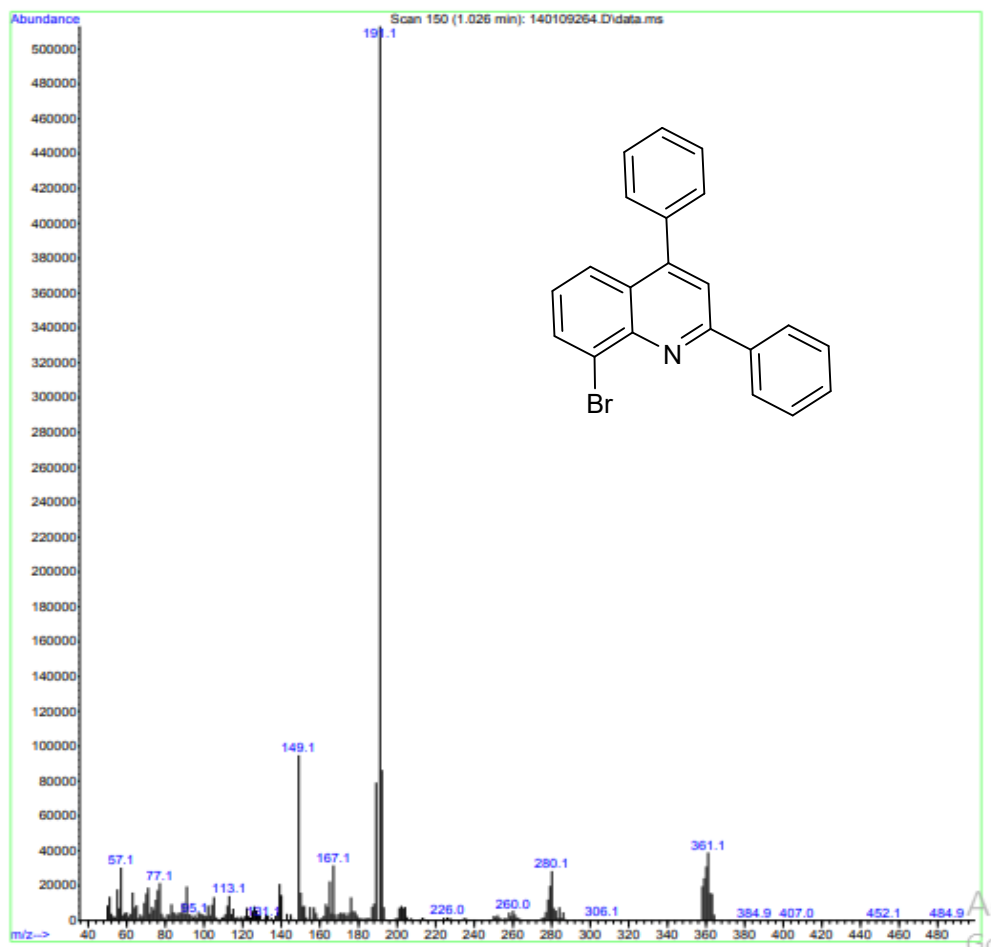

$^1\text{H}$  NMR (500 MHz,  $\text{DMSO-}d_6$ , TMS)  $\delta$  8.89 – 8.85 (m, 3H), 8.85 (s, 1H), 8.11 (d,  $J = 6.7$  Hz, 3H), 7.95 (d,  $J = 14.3$  Hz, 2H), 7.61 (dd,  $J = 9.0, 4.0$  Hz, 4H), 7.50 (s, 4H), 7.10 (d,  $J = 7.1$  Hz, 1H), 3.85 (s, 3H).  $^{13}\text{C}$  NMR (126 MHz,  $\text{DMSO-}d_6$ , TMS)  $\delta$  164.45, 160.22, 134.00, 132.41, 131.20, 129.85, 127.22, 123.82, 118.54, 117.51, 116.25, 112.65, 111.98, 56.13. MS  $m/z$  (%): 329.1.

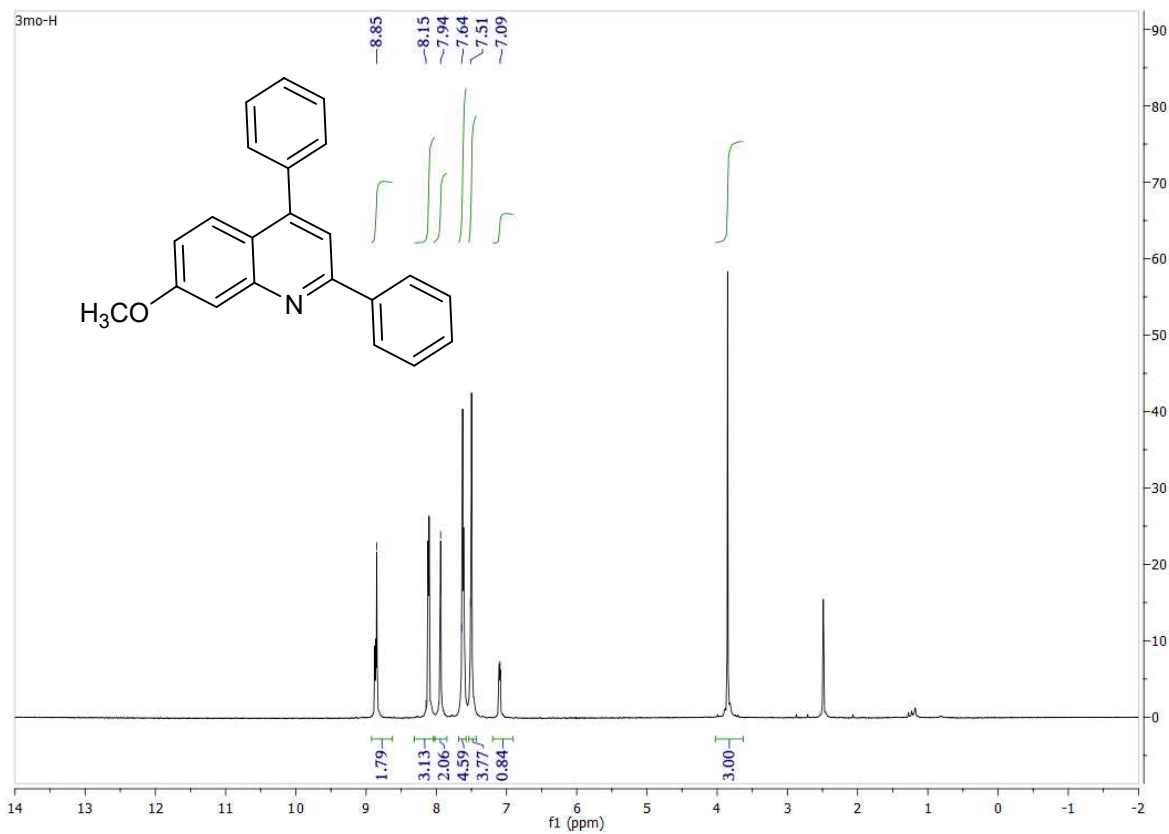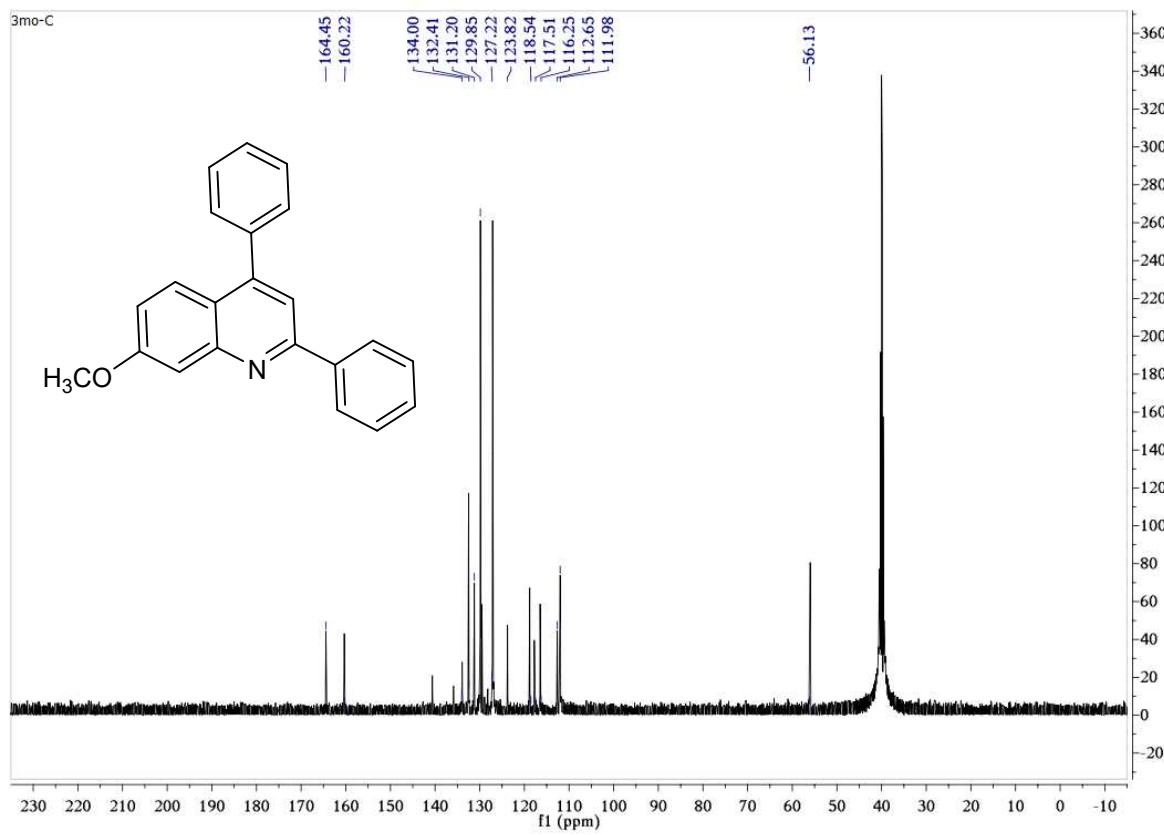



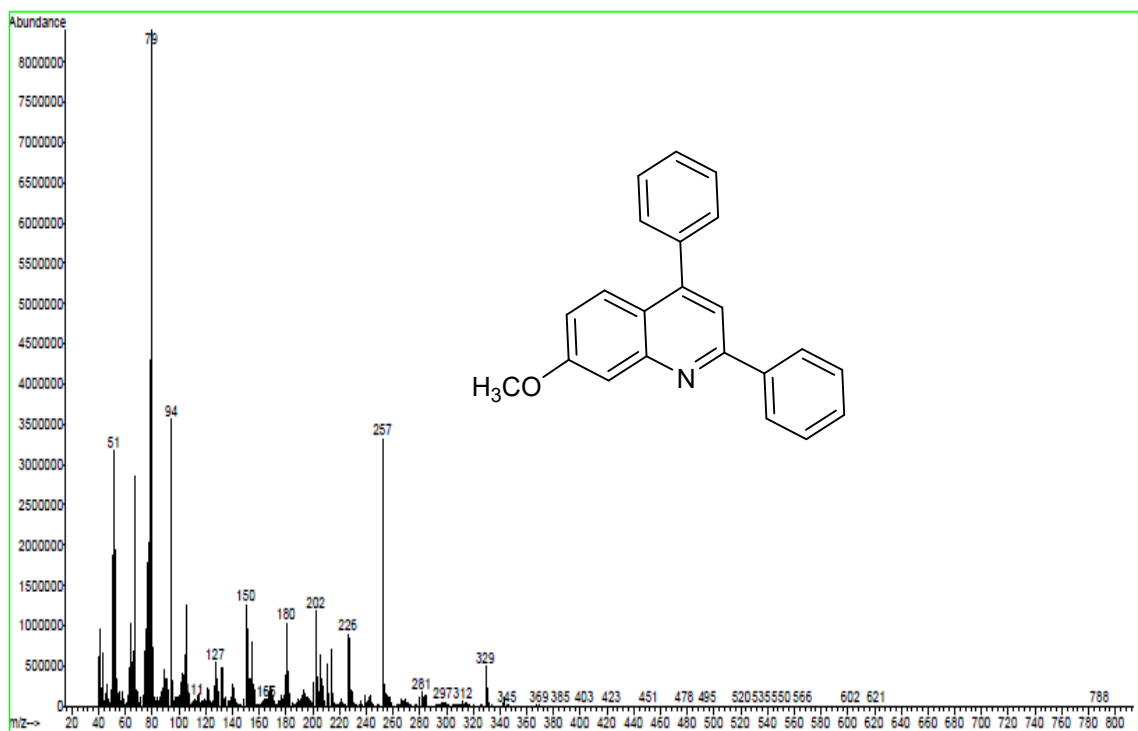

$^1\text{H}$  NMR (500 MHz,  $\text{DMSO-}d_6$ , TMS)  $\delta$  8.27 (s, 1H), 8.13 (dd,  $J = 13.8, 7.7$  Hz, 5H), 7.84 (d,  $J = 8.0$  Hz, 2H), 7.62 (d,  $J = 7.4$  Hz, 6H), 7.57 (s, 1H).  $^{13}\text{C}$  NMR (126 MHz,  $\text{DMSO-}d_6$ , TMS)  $\delta$  165.18, 164.16, 163.52, 135.23, 132.72, 132.45, 132.04, 129.84, 129.48, 127.33, 127.13, 126.14, 125.87, 123.62, 122.96.

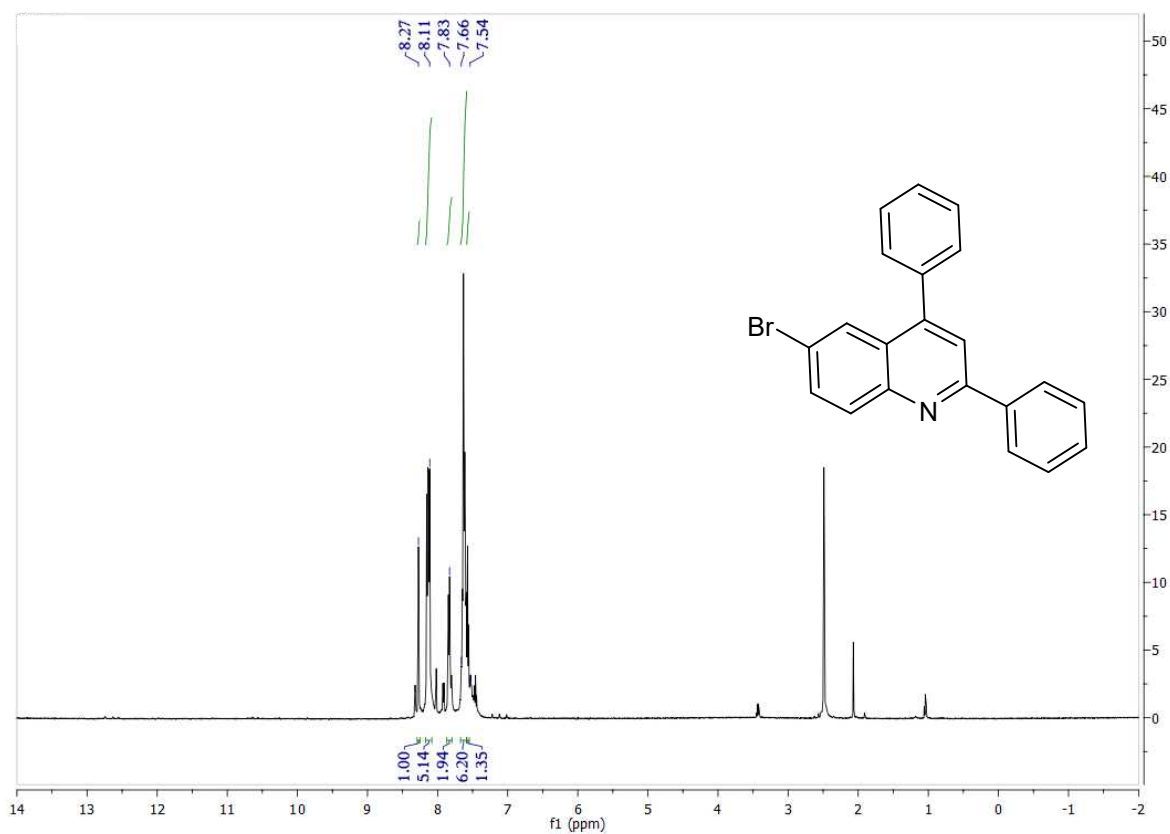



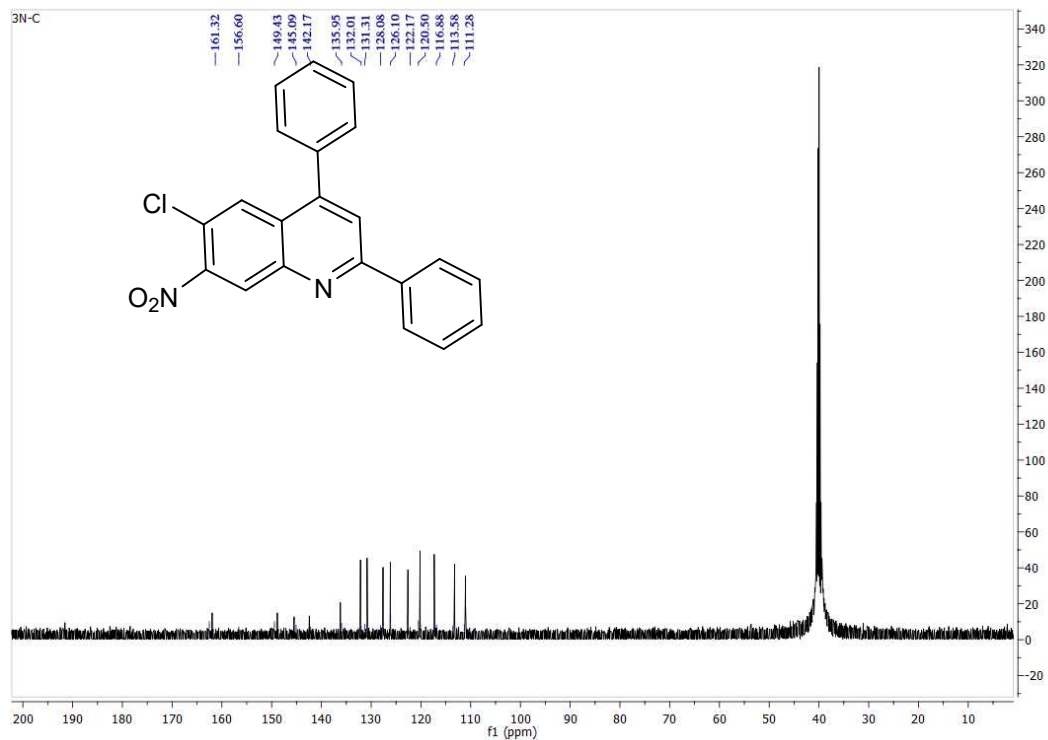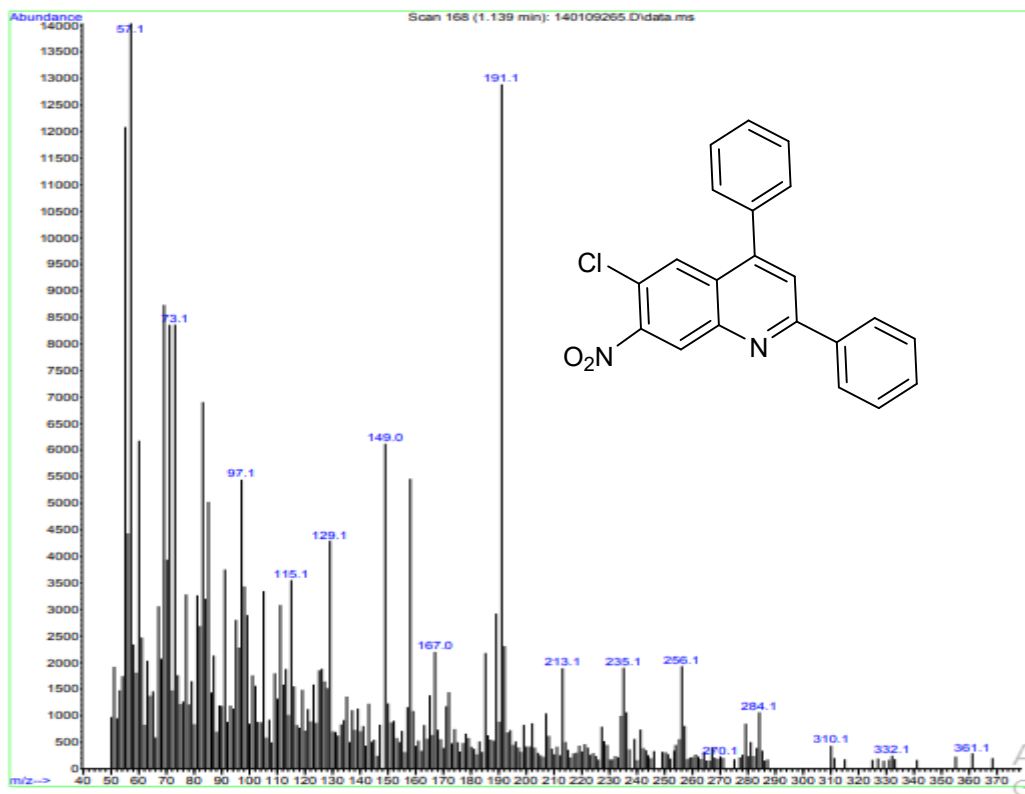

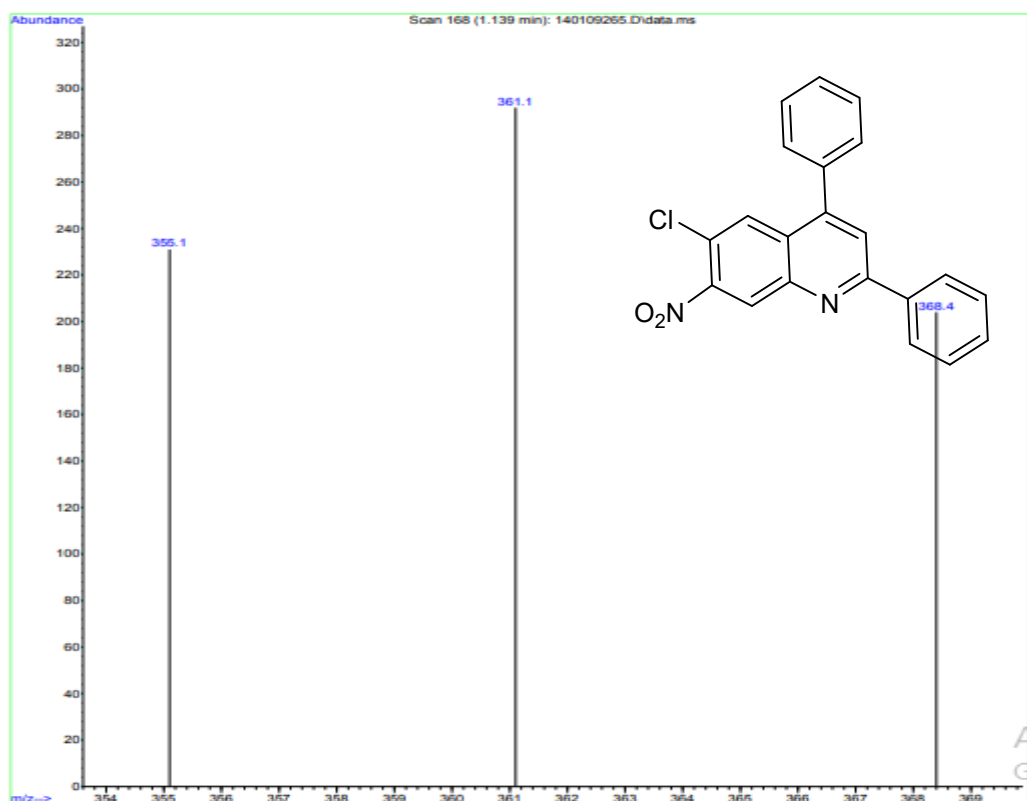

$^1\text{H}$  NMR (400 MHz,  $\text{DMSO-}d_6$ , TMS)  $\delta$  8.90 (d,  $J = 2.1$  Hz, 1H), 8.77 (dd,  $J = 4.8, 1.5$  Hz, 1H), 8.19 – 8.12 (m, 2H), 7.83 – 7.75 (m, 4H), 7.63 (dd,  $J = 7.9, 4.9$  Hz, 2H), 7.49 – 7.40 (m, 4H), 7.03 (s, 2H), 6.96 (s, 2H), 2.60 (s, 3H).  $^{13}\text{C}$  NMR (126 MHz,  $\text{DMSO-}d_6$ , TMS)  $\delta$  162.81, 155.06, 146.05, 145.23, 134.64, 131.88, 131.56, 131.38, 129.42, 129.15, 128.18, 125.71, 124.96, 23.35. MS  $m/z$  (%): 295.1.

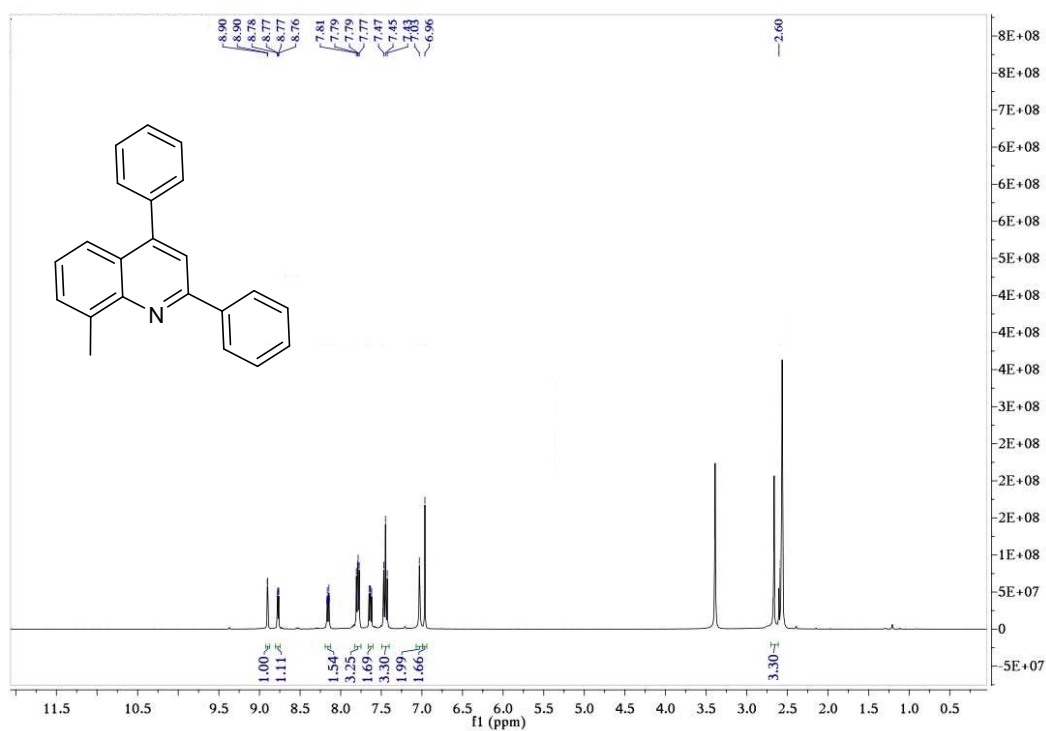

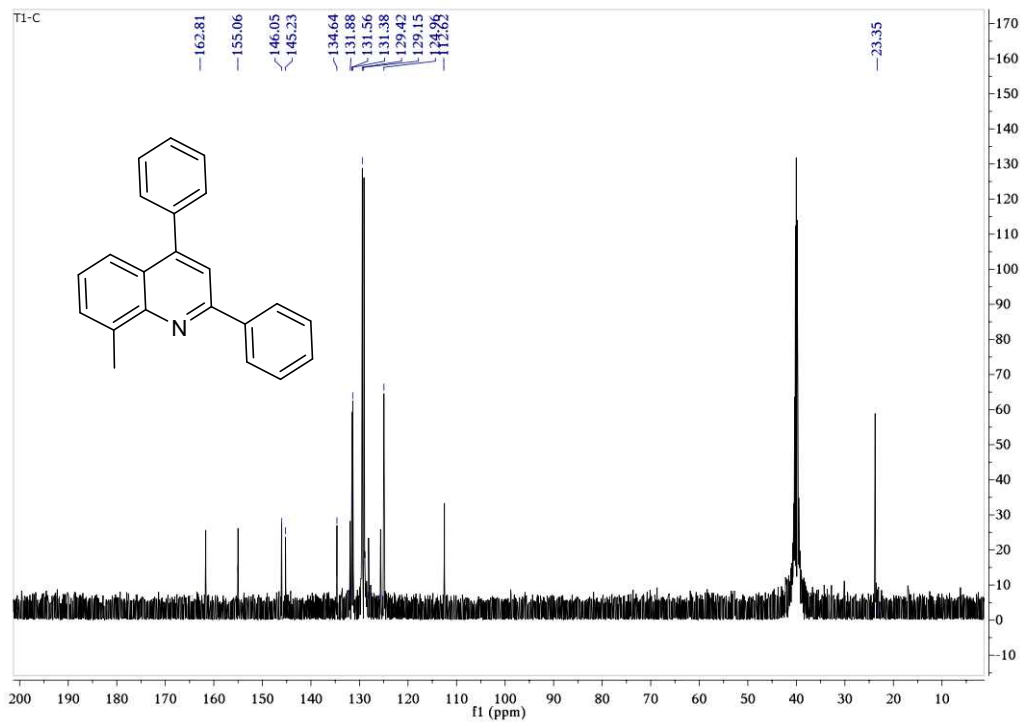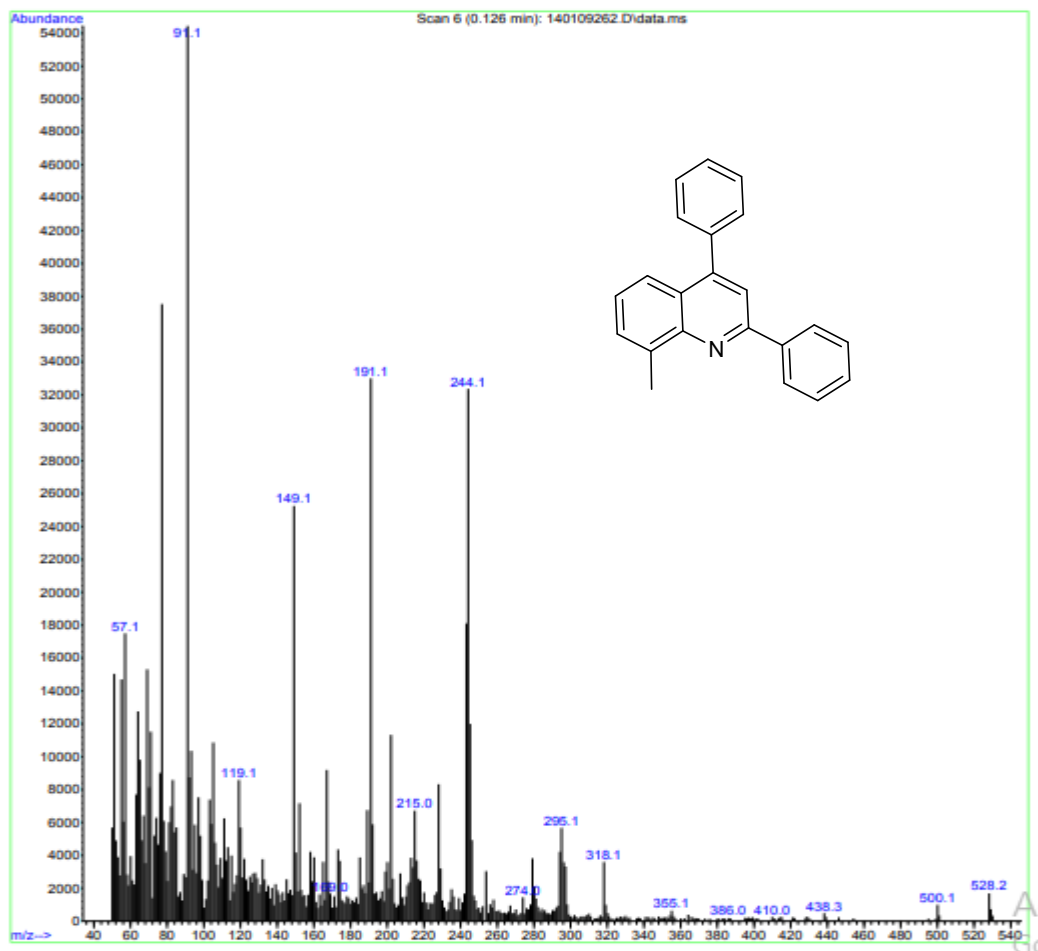

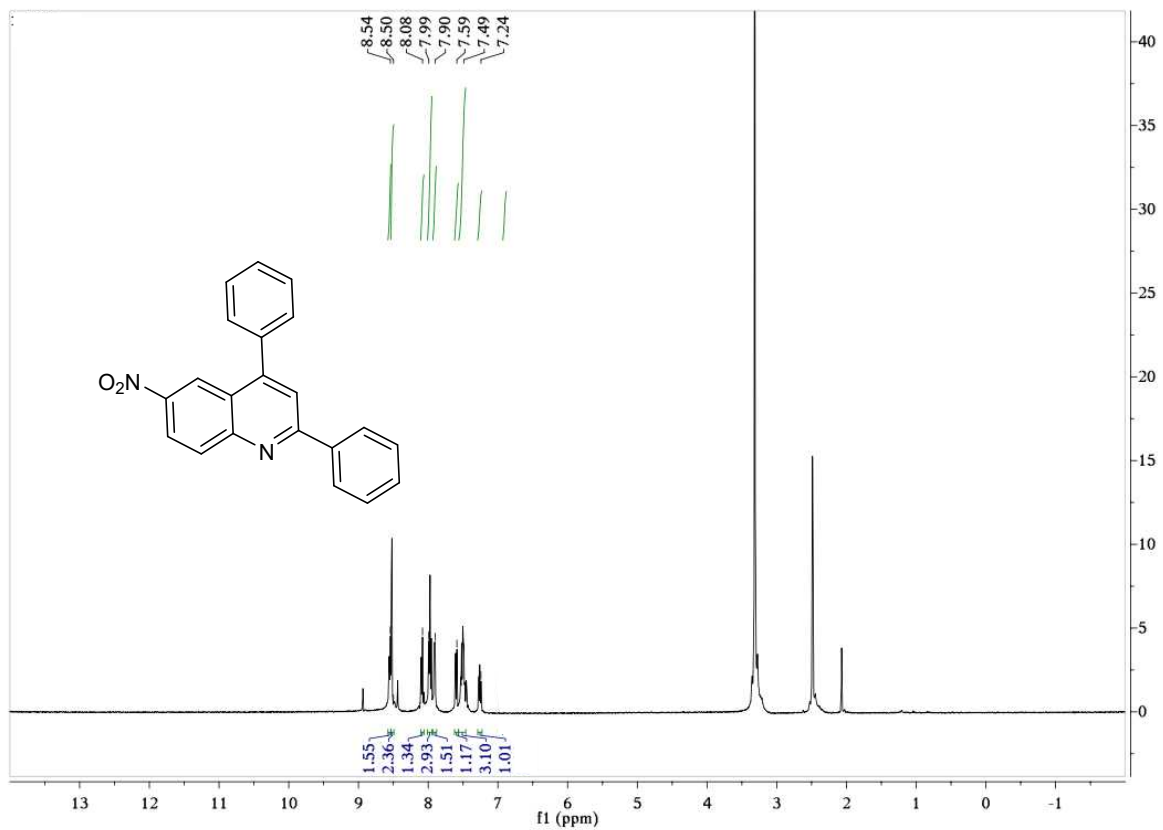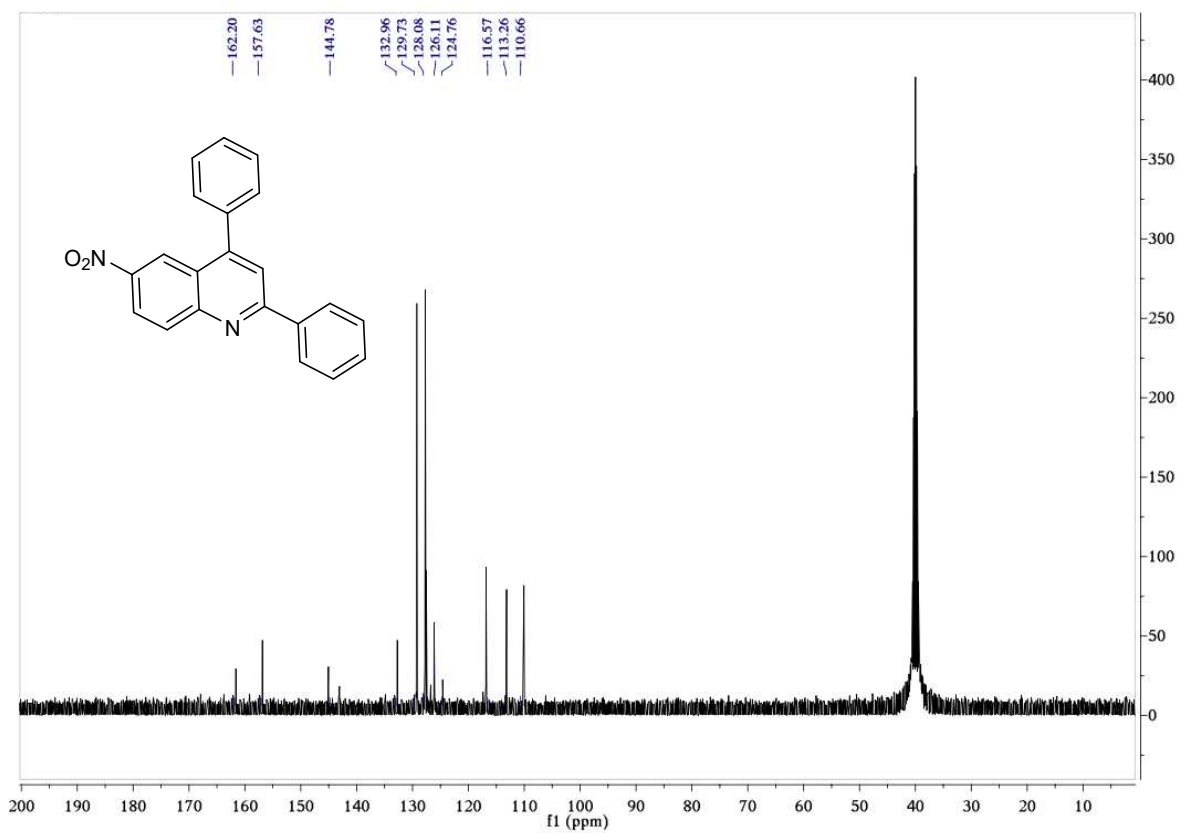

$^1\text{H NMR}$  (500 MHz,  $\text{DMSO-}d_6$ )  $\delta$  8.49 (d,  $J = 6.8$  Hz, 1H), 8.26 (s, 1H), 8.13 (d,  $J = 5$  Hz, 2H), 7.69 – 7.58 (m, 2H), 7.59 – 7.44 (m, 3H), 7.23 (ddd,  $J = 8.8, 6.8, 1.4$  Hz, 1H), 7.11 (dd,  $J = 5.1, 3.4$  Hz, 1H),

6.88 (s,  $J = 6.8$  Hz, 1H), 3.81 (s, 3H).  $^{13}\text{C}$  NMR (126 MHz, dmso)  $\delta$  164.50, 148.22, 146.41, 132.62, 129.83, 127.04, 123.72, 121.83, 117.23, 116.52, 112.43, 111.73, 57.79.

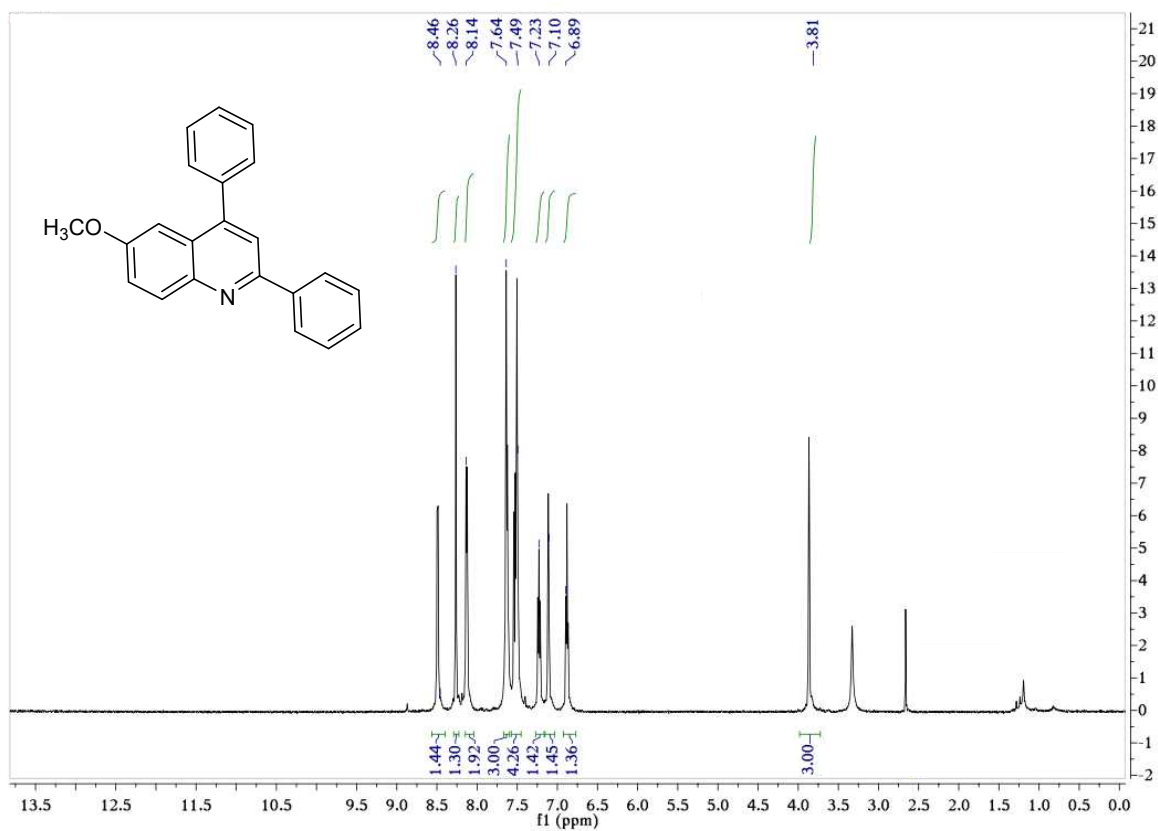

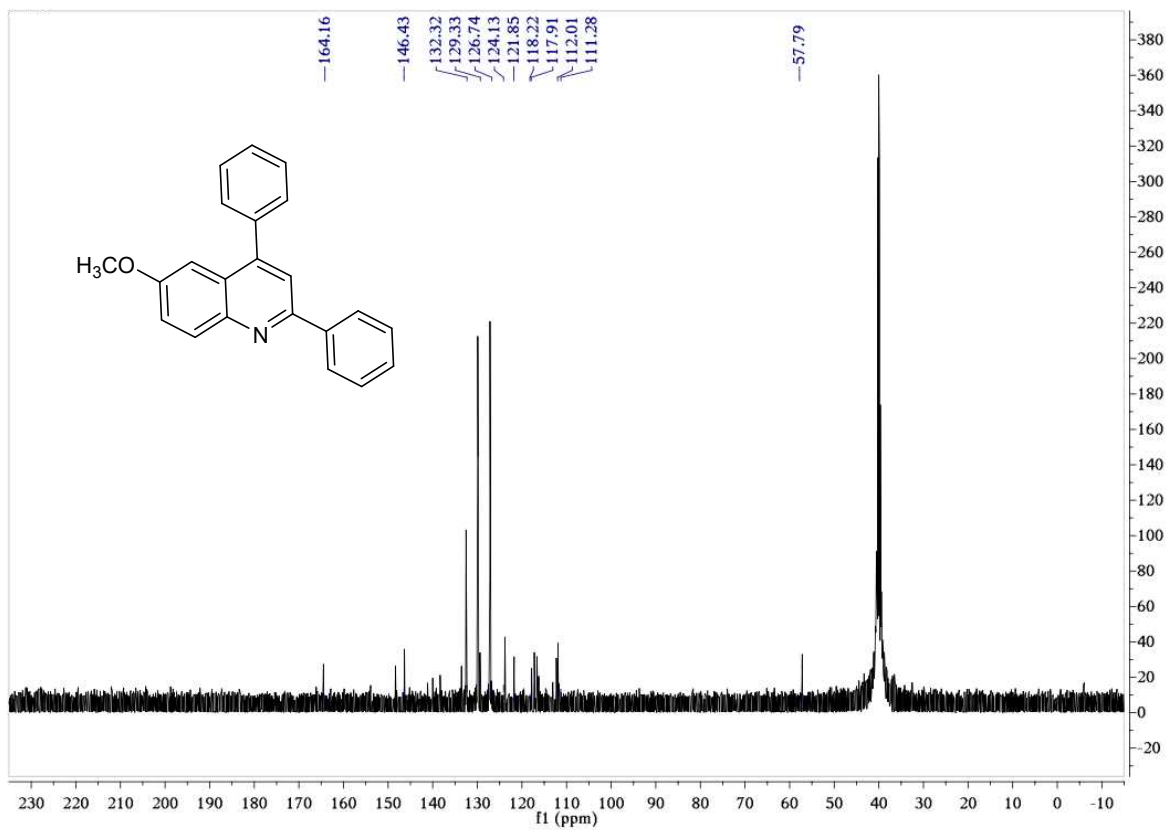

<sup>1</sup>H NMR (500 MHz, DMSO-*d*<sub>6</sub>) δ 8.93 – 8.81 (m, 2H), 8.13 (d, *J* = 10 Hz, 2H), 7.95 (d, *J* = 4.0 Hz, 1H), 7.92 – 7.80 (dd, *J* = 10, 12 Hz, 3H), 7.70– 7.60 (m, 4H), 7.50 (s, 1H). <sup>13</sup>C NMR (125 MHz, DMSO-*d*<sub>6</sub>) δ 164.4, 140.9, 135.3, 133.8, 132.9, 132.5, 129.8, 129.5, 128.5, 127.1, 126.5, 124.1, 123.8, 117.6, 112.8, 112.1



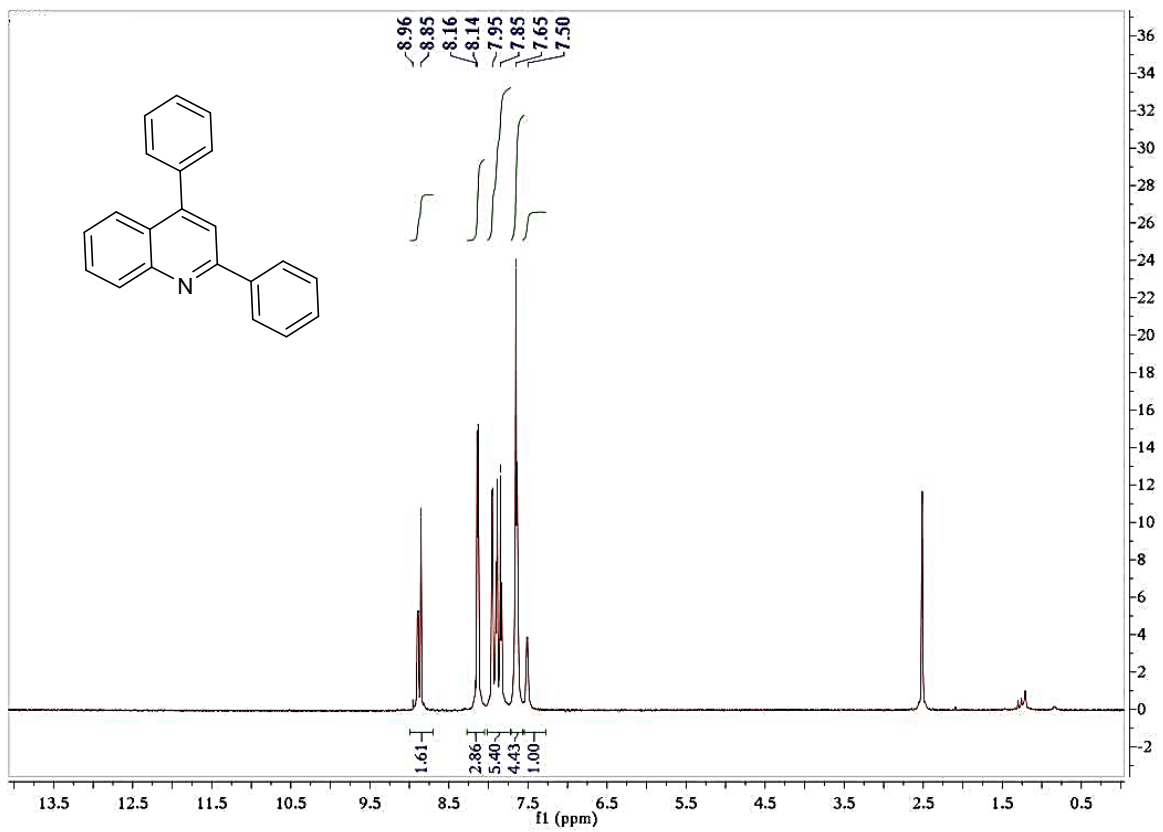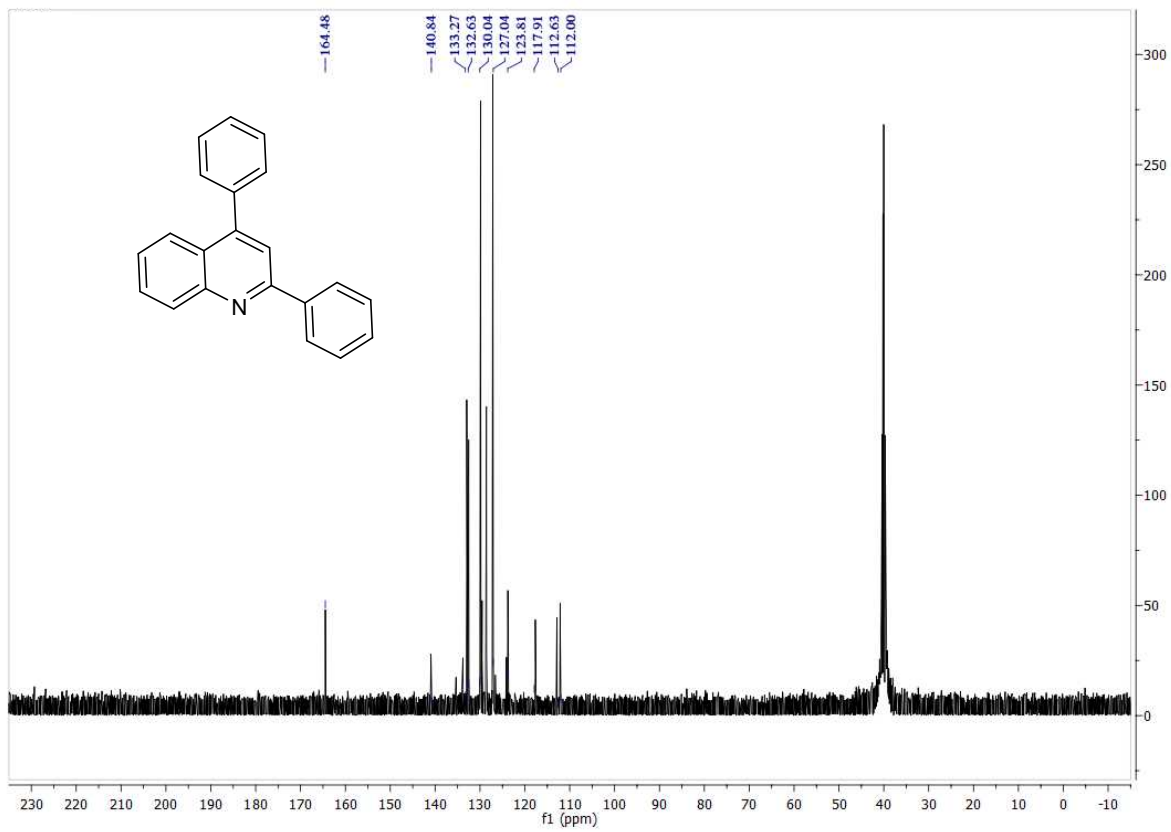

Supplement: d3ra01164j1.pdf [file d3ra01164j1.pdf]
